# Supplementary material
Source: Research Square preprint supplement (doi:10.21203/rs.3.rs-8374240/v1)
Supplement: Supplementary file 1 [file 5aaa594727c25b21f19f8c19.docx]

**Catalytic Electrophilic Arene C–H Chlorination by Rethinking of the Century-old Willgerodt Reagent**

Qi-Qi Hu,1 Yao Xiang,1 Zhaobo Ying,1 Yu Zhou,2* Hui Zhou,2*& Youwei Xie1*

1Hubei Key Laboratory of Bioinorganic Chemistry and Materia Medica; Key Laboratory of Material Chemistry for Energy Conversion and Storage, Ministry of Education; Hubei Key Laboratory of Materials Chemistry and Service Failure; School of Chemistry and Chemical Engineering, Huazhong University of Science and Technology, 1037 Luoyu Road, Wuhan 430074, China.

2College of Chemistry, Central China Normal University (CCNU), 152 Luoyu Road, Wuhan, 430079, China.

Email: zhouyu@cuhk.edu.cn, huizhou@ccnu.edu.cn, [xieyw@hust.edu.cn](mailto:xieyw@hust.edu.cn).

Section 1. Computational details

DFT calculations were performed with the Gaussian software (Gaussian 16 C01).[1] Geometry optimizations were carried out at the M06-2x[2-3]/def2-TZVP[4] level, as recommended by the previous studies[5-6]. Solvent effect with the SMD model[7] in dichloroethane is also taken into consideration during the geometry optimization. Frequency analysis was employed to ensure that the intermediates have no imaginary frequency and the transition states have only one imaginary frequency. Intrinsic reaction coordinates (IRCs)[8-9] are calculated to ensure that the transition states indeed connect the two corresponding intermediates. Corrections[10-11] of -2.6 (or 2.6) kcal/mol were made for transformations involving two molecules to one molecule (or one molecule to two molecules), as employed in many earlier studies to reduce the overestimation of entropy contribution. Multiwfn software[12] was used for the generation of .cub files, and the plots of molecular electrostatic potential were rendered in VMD[13].

**Figure S37.** The relative free energy and the corresponding I-Cl bond distances of reagent **III** and HFIP-activated **III**.

(These results showed that hydrogen-bonding with HFIP can further decrease I–Cl bond length of **III** and increase its electrophilicity.)

**Figure S38.** Chlorination for the very electron-deficient arene **IV** in the absence of substrate.

**Figure S39.** Energy profile for the chlorination process by **III_2**, formed by two HFIP molecules assisted by **III**.

**Figure S40.** I-Cl bond distances in the optimized structures of chlorination reagents.

**Figure S41.** Prohibitively high barrier for the chlorination of the very electron-deficient arene **1i** by reagent **I**.

**References**

[1]. Frisch, M. J.; Trucks, G. W.; Schlegel, H. B.; Scuseria, G. E.; Robb, M. A.; Cheeseman, J. R.; Scalmani, G.; Barone, V.; Petersson, G. A.; Nakatsuji, H.; Li, X.; Caricato, M.; Marenich, A. V.; Bloino, J.; Janesko, B. G.; Gomperts, R.; Mennucci, B.; Hratchian, H. P.; Ortiz, J. V.; Izmaylov, A. F.; Sonnenberg, J. L.; Williams; Ding, F.; Lipparini, F.; Egidi, F.; Goings, J.; Peng, B.; Petrone, A.; Henderson, T.; Ranasinghe, D.; Zakrzewski, V. G.; Gao, J.; Rega, N.; Zheng, G.; Liang, W.; Hada, M.; Ehara, M.; Toyota, K.; Fukuda, R.; Hasegawa, J.; Ishida, M.; Nakajima, T.; Honda, Y.; Kitao, O.; Nakai, H.; Vreven, T.; Throssell, K.; Montgomery Jr., J. A.; Peralta, J. E.; Ogliaro, F.; Bearpark, M. J.; Heyd, J. J.; Brothers, E. N.; Kudin, K. N.; Staroverov, V. N.; Keith, T. A.; Kobayashi, R.; Normand, J.; Raghavachari, K.; Rendell, A. P.; Burant, J. C.; Iyengar, S. S.; Tomasi, J.; Cossi, M.; Millam, J. M.; Klene, M.; Adamo, C.; Cammi, R.; Ochterski, J. W.; Martin, R. L.; Morokuma, K.; Farkas, O.; Foresman, J. B.; Fox, D. J. *Gaussian 16 Rev. C.01*, Wallingford, CT, 2016.

[2]. Zhao, Y.; Truhlar, D. G., Density Functionals with Broad Applicability in Chemistry. *Acc. Chem. Res.* **2008,** *41* (2), 157-167.

[3]. Zhao, Y.; Truhlar, D. G., The M06 suite of density functionals for main group thermochemistry, thermochemical kinetics, noncovalent interactions, excited states, and transition elements: two new functionals and systematic testing of four M06-class functionals and 12 other functionals. *Theor. Chem. Acc.* **2008,** *120* (1), 215-241.

[4]. Weigend, F.; Ahlrichs, R., Balanced basis sets of split valence, triple zeta valence and quadruple zeta valence quality for H to Rn: Design and assessment of accuracy. *Phys. Chem. Chem. Phys.* **2005,** *7* (18), 3297-3305.

[5]. Sun, T.-Y.; Chen, K.; Zhou, H.; You, T.; Yin, P.; Wang, X., Revisiting the effect of f-functions in predicting the right reaction mechanism for hypervalent iodine reagents. *J. Comput. Chem.* **2021,** *42* (7), 470-474.

[6]. Jiang, H.; Sun, T.-Y.; Chen, Y.; Zhang, X.; Wu, Y.-D.; Xie, Y.; Schaefer, H. F., Designing new Togni reagents by computation. *Chem. Commun.* **2019,** *55* (39), 5667-5670.

[7]. Marenich, A. V.; Cramer, C. J.; Truhlar, D. G., Universal Solvation Model Based on Solute Electron Density and on a Continuum Model of the Solvent Defined by the Bulk Dielectric Constant and Atomic Surface Tensions. *J. Phys. Chem. B* **2009,** *113* (18), 6378-6396.

[8]. Fukui, K., The path of chemical reactions - the IRC approach. *Acc. Chem. Res.* **1981,** *14* (12), 363-368.

[9]. Fukui, K., Formulation of the reaction coordinate. *J. Phys. Chem.* **1970,** *74* (23), 4161-4163.

[10]. Wang, Z.; Zhou, Y.; Lam, W. H.; Lin, Z., DFT Studies of Ru-Catalyzed C–O versus C–H Bond Functionalization of Aryl Ethers with Organoboronates. *Organometallics* **2017,** *36* (12), 2354-2363.

[11]. Fan, T.; Sheong, F. K.; Lin, Z., DFT Studies on Copper-Catalyzed Hydrocarboxylation of Alkynes Using CO2 and Hydrosilanes. *Organometallics* **2013,** *32* (18), 5224-5230.

[12]. Lu, T.; Chen, F., Multiwfn: A multifunctional wavefunction analyzer. *J. Comput. Chem.* **2012,** *33* (5), 580-592.

[13]. Humphrey, W.; Dalke, A.; Schulten, K., VMD: visual molecular dynamics. *J. Mol. Graphics* **1996,** *14* (1), 33-38.

**Energy table**

**Table S8.** Zero-point energy (ZPE), thermal correction to Enthalpy (Hcorr), thermal correction to Gibbs Free Energy (Gcorr), and imaginary frequency (cm-1) of transition states of optimized structures. Energies are given in Hartree.

| Structures | ZPE | Hcorr | Gcorr | Imaginary  frequency |
| --- | --- | --- | --- | --- |
| 1i | 0.084742 | 0.091552 | 0.054653 | / |
| HFIP | 0.063083 | 0.07311 | 0.028079 | / |
| PhICl2 | 0.092957 | 0.10366 | 0.054449 | / |
| I | 0.169152 | 0.182195 | 0.129938 | / |
| II | 0.095177 | 0.105831 | 0.058098 | / |
| III | 0.096104 | 0.108122 | 0.057214 | / |
| IV | 0.106104 | 0.116968 | 0.068973 | / |
| III_1 | 0.160134 | 0.183255 | 0.10108 | / |
| TS1 | 0.245481 | 0.275713 | 0.178897 | -268.3 |
| INT1 | 0.246855 | 0.277176 | 0.181117 | / |
| TS3 | 0.265534 | 0.299449 | 0.193897 | -288.0 |
| III_2 | 0.224883 | 0.258656 | 0.150907 | / |
| TS1' | 0.309889 | 0.351094 | 0.225097 | -267.0 |
| INT2' | 0.311562 | 0.352638 | 0.228993 | / |
| TS2' | 0.306923 | 0.347119 | 0.225001 | -105.2 |
| 2i | 0.075343 | 0.083341 | 0.043124 | / |
| TS3' | 0.33058 | 0.375406 | 0.242569 | -281.3 |
| TS1_1 | 0.316124 | 0.346508 | 0.248363 | -267.8 |

**Cartesian coordinates of optimized structures**

1i

C -0.000009 1.761761 0.000147

C 1.208628 1.078176 -0.000005

C 1.174533 -0.302486 -0.000113

C -0.000000 -1.029256 -0.000041

C -1.174524 -0.302504 0.000035

C -1.208624 1.078175 0.000090

H -0.000002 2.843768 0.000213

H 2.158848 1.594270 -0.000019

H 0.000020 -2.110665 -0.000089

H -2.158857 1.594246 0.000134

F -2.336323 -0.979155 0.000036

F 2.336320 -0.979158 -0.000139

HFIP

H 0.337924 2.471653 -0.595755

C -0.001266 0.561154 -0.499357

C -1.275332 -0.143769 -0.040065

H 0.000160 0.540263 -1.592879

C 1.271829 -0.150745 -0.035419

O -0.036694 1.844221 0.036625

F -2.337627 0.458622 -0.575068

F -1.299116 -1.421698 -0.419830

F -1.419570 -0.107967 1.283770

F 1.325517 -0.285332 1.289161

F 2.333925 0.567805 -0.408956

F 1.395102 -1.363155 -0.575224

IV

C -0.106340 0.961983 -0.012663

C 1.160294 0.375540 -0.021378

C 2.301845 1.169338 -0.004889

C 2.187859 2.550225 0.015128

C 0.931613 3.134276 0.024145

C -0.211285 2.345504 0.013742

H 3.273950 0.696640 -0.009474

H 3.079896 3.161808 0.025109

H 0.829567 4.211668 0.042073

H -1.188472 2.808272 0.027155

I -1.899730 -0.120718 -0.005293

O 0.781926 -1.917864 1.235555

S 1.424819 -1.374646 -0.097107

O 0.709022 -1.918201 -1.207756

O 2.820884 -1.624586 0.037949

H -0.184956 -2.022007 1.138884

PhICl2

C 2.996146 -0.268404 1.175786

C 1.607542 -0.270388 1.188630

C 0.951336 -0.000030 0.000357

C 1.606941 0.270344 -1.188241

C 2.995550 0.268427 -1.176079

C 3.684789 0.000032 -0.000317

H 3.535876 -0.475706 2.090595

H 1.058206 -0.477779 2.097017

H 1.057144 0.477707 -2.096356

H 3.534820 0.475760 -2.091154

H 4.767213 0.000063 -0.000585

I -1.138335 -0.000052 0.000892

Cl -1.078663 2.490201 0.136040

Cl -1.078708 -2.490036 -0.138839

I

C 0.000000 0.839332 0.000000

C 1.365493 1.053057 0.000000

C 1.836591 2.360090 0.000000

C 0.934834 3.411728 0.000000

C -0.433312 3.161234 0.000000

C -0.925832 1.860189 0.000000

C 2.282014 -0.125401 0.000000

H 2.905973 2.528315 0.000000

H 1.295072 4.431849 0.000000

H -1.134504 3.985798 0.000000

H -1.988872 1.670128 0.000000

I -0.448886 -1.209598 0.000000

O 1.649062 -1.278236 0.000000

O 3.486004 -0.029263 0.000000

Cl -2.866233 -0.788753 0.000000

III

C -0.083781 0.929481 -0.065231

C -1.428525 0.619960 -0.003557

C -2.365249 1.641968 0.025446

C -1.931995 2.958833 -0.008124

C -0.575774 3.247109 -0.072541

C 0.372310 2.229744 -0.102251

H -3.419791 1.399686 0.070038

H -2.655901 3.762439 0.011436

H -0.239134 4.274760 -0.107839

H 1.424531 2.465024 -0.160509

I 1.216546 -0.740130 -0.117591

O -0.693409 -1.732760 -0.511524

Cl 3.169031 0.597811 0.265889

S -1.925025 -1.076680 0.091947

O -2.061301 -1.409034 1.482435

O -3.068004 -1.279893 -0.747724

III-HFIP

C 2.737976 0.949257 -0.255775

C 1.418215 1.159810 0.096104

C 0.848806 2.410770 -0.092586

C 1.615558 3.429656 -0.635147

C 2.938221 3.196409 -0.985499

C 3.519723 1.947062 -0.799146

H -0.185596 2.575508 0.182782

H 1.178056 4.406999 -0.787926

H 3.534482 3.990036 -1.415960

H 4.547955 1.777900 -1.082179

I 3.475447 -1.004973 0.084566

O 1.318280 -1.338626 0.440956

Cl 5.730277 -0.408277 -0.395000

S 0.483242 -0.145824 0.833171

O 0.459788 0.059005 2.251771

O -0.803848 -0.200976 0.177940

H -2.393925 -0.588360 0.891631

C -3.972739 -0.023632 -0.051907

C -5.148473 0.782348 0.493745

H -3.320096 0.680277 -0.578497

C -4.404234 -1.077092 -1.074728

O -3.358385 -0.645071 1.022765

F -4.696895 1.747649 1.296029

F -5.851715 1.364715 -0.480615

F -5.987908 0.031517 1.206671

F -5.292583 -1.937880 -0.575607

F -3.337261 -1.780826 -1.458071

F -4.939321 -0.530407 -2.169005

TS1

C 2.411903 -1.053004 0.489049

C 3.090732 0.067835 0.955465

C 3.498501 0.092818 2.282789

C 3.231099 -0.977673 3.124885

C 2.560604 -2.089940 2.640976

C 2.151530 -2.135628 1.314441

H 4.031582 0.962685 2.642146

H 3.554228 -0.941853 4.156968

H 2.356081 -2.933373 3.287642

H 1.639254 -3.008676 0.933535

I 1.740959 -1.184327 -1.497068

O 4.071710 0.915895 -1.280188

Cl -0.645959 -2.194172 -0.743724

S 3.461945 1.477572 -0.089446

O 2.147796 2.076499 -0.361366

O 4.323876 2.333818 0.690867

H 0.711123 1.511986 0.211482

C -0.991882 2.366534 -0.054280

C -1.964610 2.818400 1.032177

H -0.400282 3.245393 -0.333540

C -1.705237 1.898578 -1.323779

O -0.230280 1.331703 0.455567

F -0.802854 1.490823 -2.216826

F -2.424742 2.868102 -1.893675

F -2.529836 0.869864 -1.095091

F -2.780125 3.788716 0.612101

F -2.729553 1.816118 1.475184

F -1.284739 3.288995 2.077574

C -3.358927 -2.715446 -0.995634

C -2.395890 -3.100775 -0.003204

C -2.455922 -2.421832 1.252894

C -3.283984 -1.362991 1.493610

C -4.140359 -1.015237 0.456959

C -4.204042 -1.670661 -0.781302

H -3.370224 -3.257467 -1.931626

H -2.018507 -4.116246 0.001074

H -3.280771 -0.827671 2.432339

H -4.912774 -1.330023 -1.522743

F -4.949202 0.002288 0.650240

F -1.627426 -2.829892 2.189654

INT1

C 1.518402 0.156320 -1.333005

C 1.254570 1.497678 -1.054511

C 2.239318 2.447141 -1.314849

C 3.466830 2.076504 -1.845208

C 3.717820 0.742882 -2.126956

C 2.744786 -0.215939 -1.872944

H 2.022822 3.484333 -1.098019

H 4.218206 2.830320 -2.041455

H 4.667174 0.437460 -2.548559

H 2.934810 -1.253719 -2.110292

I 0.140050 -1.386538 -0.997291

O -1.321716 1.687166 -1.365634

Cl 3.624557 -2.748665 0.412469

S -0.313140 2.088269 -0.403145

O -0.458242 1.394241 0.886599

O -0.151223 3.516165 -0.250212

H -1.726939 0.349876 1.162699

C -3.332306 -0.180409 0.217715

C -4.359796 0.940376 0.397694

H -2.796473 0.034392 -0.713882

C -3.992365 -1.545155 0.061904

O -2.502210 -0.244066 1.322193

F -3.076439 -2.462334 -0.262982

F -4.919066 -1.547009 -0.900533

F -4.579767 -1.960895 1.185736

F -5.079768 1.147536 -0.708615

F -5.219015 0.694748 1.393937

F -3.733573 2.079762 0.689663

C 2.131932 -1.200215 2.091474

C 3.496013 -1.403649 1.554201

C 4.169167 -0.172279 1.084549

C 3.704654 1.069239 1.350288

C 2.452147 1.139704 1.971802

C 1.653993 0.031996 2.343300

H 1.569201 -2.090212 2.343242

H 4.093027 -1.696798 2.442110

H 4.247290 1.964784 1.081496

H 0.686549 0.212098 2.786770

F 1.997474 2.321229 2.235514

F 5.313550 -0.340175 0.488877

TS3

C -1.643245 -2.632737 0.565971

C -0.777932 -2.821157 -0.533838

C -1.311285 -3.032891 -1.820272

C -2.655972 -2.951426 -2.035987

C -3.539422 -2.604393 -0.965623

C -2.995419 -2.553662 0.355641

H -0.637302 -3.232883 -2.640787

H -3.063170 -3.085968 -3.029772

H -4.600656 -2.788220 -1.075849

H -3.666566 -2.396353 1.190070

I 1.276776 -2.750256 -0.424308

O -0.844749 -0.961867 2.422406

Cl -3.537697 -0.505221 -1.253077

S -1.122370 -2.464190 2.268687

O -2.268901 -2.744755 3.074442

O 0.061533 -3.236801 2.472333

H 2.464002 0.164482 0.939669

C 3.814171 0.975096 -0.188981

C 4.784822 0.281389 -1.138671

H 2.988720 1.361120 -0.796521

C 4.435570 2.180593 0.518226

O 3.416503 0.040485 0.754493

F 4.150171 -0.691080 -1.797643

F 5.285120 1.121840 -2.047110

F 5.811302 -0.279532 -0.497704

F 5.520870 1.856581 1.224862

F 3.546185 2.696239 1.369261

F 4.782336 3.146467 -0.335712

C -2.527742 2.446573 0.443557

C -1.306577 2.040873 0.981721

C -1.037595 2.332781 2.315070

C -1.963734 3.004509 3.098456

C -3.178579 3.390327 2.556297

C -3.462650 3.112515 1.227527

H -0.092779 2.023138 2.740478

H -1.732553 3.217562 4.133685

H -3.912776 3.907146 3.160289

H -4.409466 3.412225 0.800069

I -3.096044 2.163281 -1.550278

O -0.654490 0.258900 -0.830752

S -0.020498 1.192193 0.065306

O 0.795318 2.210373 -0.550398

O 0.737366 0.471675 1.134653

H -0.100487 -0.500934 1.854616

III-2HFIP

C -3.259052 -0.358625 0.972320

C -1.916270 -0.589676 1.211578

C -1.367751 -0.246355 2.437154

C -2.176793 0.341151 3.398756

C -3.517784 0.576864 3.134169

C -4.081477 0.223000 1.911890

H -0.322920 -0.447640 2.633255

H -1.757957 0.609405 4.359183

H -4.149361 1.029365 3.887141

H -5.131372 0.394531 1.726656

I -3.977576 -1.012041 -0.908208

O -1.983008 -2.034955 -0.844431

Cl -6.024408 0.172756 -0.703948

S -0.932088 -1.278750 -0.081830

O -0.381188 -0.197443 -0.858114

O 0.047759 -2.171455 0.494357

H 1.637237 -1.600960 -0.103350

C 3.541956 -1.591660 0.318014

C 4.602165 -0.498086 0.212560

H 3.305731 -1.712574 1.380097

C 4.045546 -2.946426 -0.188154

O 2.453499 -1.184448 -0.445399

H 1.943825 0.646090 -0.986375

C 1.132621 2.373943 -0.600871

C 1.298163 3.773327 -1.181892

H 0.114472 2.049892 -0.834323

C 1.255689 2.363960 0.925537

O 2.112391 1.585285 -1.178425

F 1.318204 1.098561 1.354447

F 0.200070 2.932707 1.512972

F 2.349411 2.985814 1.366865

F 0.474110 4.644585 -0.592445

F 2.539275 4.239388 -1.053709

F 1.009973 3.761353 -2.483713

F 4.197270 0.590508 0.864786

F 5.761512 -0.884283 0.748882

F 4.833246 -0.149312 -1.051180

F 4.540460 -2.874958 -1.423929

F 3.027544 -3.809830 -0.212044

F 4.989205 -3.457993 0.602279

TS1'

C 0.042021 -2.104846 0.034422

C 1.214280 -1.356121 -0.006041

C 2.017200 -1.313588 1.125756

C 1.656832 -2.004535 2.273983

C 0.490750 -2.752592 2.294904

C -0.322400 -2.809987 1.170198

H 2.928964 -0.732663 1.103045

H 2.294226 -1.959735 3.147353

H 0.206230 -3.302213 3.182707

H -1.226566 -3.403162 1.184248

I -1.253079 -2.215890 -1.614493

O 1.601973 -1.369971 -2.566151

Cl -3.437481 -1.912894 -0.089318

S 1.708985 -0.441977 -1.462343

O 0.762309 0.670399 -1.540245

O 3.072211 0.002532 -1.207901

H 3.964921 0.959940 -0.111269

C 5.746740 0.358767 0.286399

C 6.281055 -0.068426 1.650721

H 5.459678 -0.554721 -0.245705

C 6.807067 1.052901 -0.571021

O 4.686345 1.223572 0.498453

H -0.546013 0.916874 -0.502902

C -1.783146 2.387484 -0.608596

C -2.138120 3.373843 0.501493

H -1.022966 2.870659 -1.231643

C -2.970998 2.085261 -1.524261

O -1.343705 1.218846 -0.012068

F -2.624034 1.153836 -2.412602

F -3.373746 3.160308 -2.205232

F -4.028741 1.617654 -0.851027

F -2.674781 4.499798 0.025202

F -3.003391 2.856166 1.377366

F -1.039384 3.704967 1.179284

F 5.344751 -0.764573 2.301289

F 7.360647 -0.846835 1.547977

F 6.604273 0.973330 2.417200

F 7.308748 2.138645 0.021144

F 6.256545 1.443193 -1.721655

F 7.828415 0.245678 -0.867994

C -6.075358 -1.201655 0.414233

C -5.083672 -1.823557 1.242611

C -4.479213 -1.011498 2.248887

C -4.713840 0.328695 2.370798

C -5.644725 0.864318 1.490599

C -6.336891 0.130531 0.516993

H -6.585778 -1.813853 -0.317149

H -5.138939 -2.889089 1.429764

H -4.213254 0.938704 3.109374

H -7.050123 0.636485 -0.118210

F -5.894521 2.152283 1.576474

F -3.625042 -1.601918 3.057603

INT2'

C 0.643944 1.686538 -1.351000

C -0.371144 0.740353 -1.202100

C -1.671523 1.077493 -1.566519

C -1.968520 2.336098 -2.068689

C -0.954608 3.268130 -2.222927

C 0.349063 2.943060 -1.868499

H -2.450584 0.335183 -1.463544

H -2.986659 2.578213 -2.344749

H -1.166460 4.251553 -2.623171

H 1.142421 3.664301 -2.008286

I 2.646994 1.327679 -0.852418

O 0.849555 -1.539984 -1.509429

Cl 1.803720 4.991869 0.610305

S -0.078337 -0.918954 -0.591710

O 0.462624 -0.739887 0.758143

O -1.391696 -1.555545 -0.571181

H -2.689806 -1.293512 0.480770

C -4.510038 -1.461664 -0.133901

C -5.533067 -0.329095 -0.187319

H -4.066457 -1.535958 -1.133217

C -5.148432 -2.819344 0.166550

O -3.590469 -1.161427 0.854711

H 2.023193 -1.312451 1.148386

C 3.398859 -2.300425 0.212002

C 2.982566 -3.774576 0.209610

H 3.016789 -1.867509 -0.718738

C 4.913813 -2.133625 0.204064

O 2.919460 -1.668843 1.346308

F 5.232440 -0.850153 0.012540

F 5.487781 -2.839837 -0.773874

F 5.475112 -2.508369 1.354616

F 3.247502 -4.366532 -0.958231

F 3.594090 -4.483176 1.165853

F 1.671500 -3.872402 0.423749

F -4.918166 0.815151 -0.504592

F -6.477197 -0.542005 -1.105731

F -6.142113 -0.138142 0.983543

F -5.768863 -2.836837 1.347824

F -4.198375 -3.754667 0.200442

F -6.036805 -3.180466 -0.762710

C 1.192647 2.828988 2.156417

C 0.662511 4.106833 1.631519

C -0.698365 4.026436 1.055148

C -1.506840 2.955189 1.220392

C -0.934188 1.842262 1.847653

C 0.399016 1.753744 2.312502

H 2.224857 2.825291 2.482628

H 0.515313 4.726446 2.539902

H -2.530533 2.936791 0.873005

H 0.739178 0.826211 2.747387

F -1.695968 0.811703 2.018104

F -1.131134 5.099850 0.462035

TS2'

C 2.405514 -3.078473 0.325382

C 1.290664 -2.568765 0.990919

C 0.389709 -3.443342 1.588980

C 0.588351 -4.814317 1.523471

C 1.694917 -5.316852 0.857614

C 2.602010 -4.451955 0.260755

H -0.467451 -3.037205 2.107369

H -0.120211 -5.483440 1.993714

H 1.862365 -6.384733 0.799031

H 3.466146 -4.845798 -0.256845

I 3.845801 -1.877968 -0.611389

O 2.073000 -0.244195 1.864545

Cl -2.506034 -2.696782 -0.832654

S 0.977622 -0.816942 1.118382

O 0.845754 -0.323100 -0.247760

O -0.308054 -0.712944 1.836654

H -1.439184 -0.161837 1.108061

C -2.289571 1.640351 0.776744

C -3.565424 2.029390 1.524065

H -1.440420 2.018960 1.354190

C -2.204822 2.257984 -0.620479

O -2.269862 0.257719 0.658975

H 1.829961 0.885170 -0.965401

C 3.217301 1.972440 -0.182167

C 2.556599 3.121774 0.583227

H 3.367025 1.161750 0.539843

C 4.589593 2.352869 -0.727189

O 2.427759 1.608169 -1.258876

F 5.182054 1.280415 -1.257445

F 5.395572 2.824376 0.228508

F 4.518994 3.277930 -1.686142

F 3.211980 3.424503 1.706714

F 2.465214 4.239769 -0.143411

F 1.314369 2.772853 0.926535

F -3.551194 1.490637 2.742351

F -3.700765 3.345241 1.659623

F -4.656417 1.567050 0.899872

F -3.204326 1.828196 -1.405058

F -1.065962 1.907844 -1.203739

F -2.261081 3.587566 -0.586733

C -4.812642 -1.875795 0.409127

C -3.831870 -1.570486 -0.615181

C -4.323846 -0.912614 -1.805585

C -5.573050 -0.368113 -1.874107

C -6.409815 -0.609216 -0.792382

C -6.062182 -1.353760 0.347386

H -4.486644 -2.462180 1.259121

H -3.293420 -0.635361 -0.080354

H -5.905615 0.194574 -2.735712

H -6.794227 -1.501747 1.128663

F -7.617349 -0.110766 -0.842037

F -3.493593 -0.774661 -2.798915

2i

C -0.018388 -1.475432 0.000104

C -0.823147 -0.346765 0.000035

C -0.232032 0.907609 -0.000051

C 1.138671 1.065472 -0.000087

C 1.907328 -0.081284 -0.000019

C 1.362365 -1.349946 0.000084

H -0.476898 -2.455046 0.000176

H 1.584860 2.050642 -0.000161

H 2.006723 -2.218183 0.000139

F 3.242532 0.051264 -0.000037

F -1.005206 1.996083 -0.000132

Cl -2.544671 -0.477733 0.000057

TS3'

C 4.391452 -0.486080 0.301014

C 4.292372 -0.118162 -1.060227

C 4.419042 -1.098013 -2.062876

C 4.531435 -2.417687 -1.733619

C 4.472558 -2.829377 -0.364316

C 4.503571 -1.808636 0.638377

H 4.398238 -0.793364 -3.099308

H 4.602865 -3.173505 -2.505300

H 4.824762 -3.817421 -0.096223

H 4.565249 -2.102244 1.678274

I 3.911155 1.792528 -1.722363

O 2.881891 0.860068 1.987411

Cl 2.398147 -3.181649 -0.247662

S 4.384609 0.656724 1.673953

O 4.913198 -0.044218 2.798428

O 4.992916 1.881951 1.269962

H -0.127214 3.058006 0.900831

C -1.806215 3.532327 0.090215

C -2.234089 4.854797 -0.538377

H -1.528763 2.861437 -0.727861

C -2.962602 2.855273 0.835076

O -0.760675 3.800452 0.957522

H -2.400354 -0.398988 -0.140227

C -4.150578 -0.939295 -0.814016

C -5.467173 -1.115094 -0.061538

H -4.213298 0.015200 -1.346353

C -3.926395 -2.020344 -1.874113

O -3.134185 -0.992177 0.125432

F -2.757363 -1.801150 -2.482146

F -4.873123 -2.019668 -2.814009

F -3.877009 -3.246388 -1.348868

F -6.516355 -1.120635 -0.886995

F -5.498993 -2.249327 0.640348

F -5.633942 -0.109696 0.796619

F -1.285832 5.291010 -1.369554

F -3.362148 4.723720 -1.243192

F -2.433835 5.808562 0.370362

F -3.625497 3.698390 1.632353

F -2.497768 1.869743 1.601252

F -3.848103 2.325186 -0.014603

C -0.359959 -1.990245 1.556720

C -0.099990 -0.619041 1.555778

C -0.172436 0.073176 2.759146

C -0.496429 -0.582690 3.937941

C -0.749343 -1.943931 3.926123

C -0.680646 -2.651523 2.734489

H 0.025651 1.135901 2.770715

H -0.547427 -0.023062 4.862338

H -1.000900 -2.465677 4.840195

H -0.877578 -3.714589 2.720188

I -0.332505 -3.189249 -0.155486

O 1.260197 -0.404794 -0.677448

S 0.277588 0.323964 0.080866

O -0.997824 0.525134 -0.597344

O 0.822108 1.604193 0.587295

H 2.287925 1.296200 1.302951
